# Supplementary material
Source: PubMed Central journal article supplement (PMC10153758)
Supplement: NIHMS1877881-supplement-1.pdf [file NIHMS1877881-supplement-1.pdf]

eSupplement 1. ICD-9 codes used to search the Rochester Epidemiology Project Database to identify potential cases of eye trauma

| Code   | Text                                                           |
|--------|----------------------------------------------------------------|
| 360.50 | FOREIGN BODY, MAGNETIC, INTRAOCULAR, UNSPECIFIED               |
| 360.50 | RETAINED (OLD) INTRAOCULAR FOREIGN BODY, MAGNETIC              |
| 360.51 | FOREIGN BODY, MAGNETIC, IN ANTERIOR CHAMBER OF EYE             |
| 360.52 | FOREIGN BODY, MAGNETIC, IN IRIS OR CILIARY BODY                |
| 360.53 | FOREIGN BODY, MAGNETIC, IN LENS                                |
| 360.54 | FOREIGN BODY, MAGNETIC, IN VITREOUS                            |
| 360.55 | FOREIGN BODY, MAGNETIC, IN POSTERIOR WALL                      |
| 360.59 | INTRAOCULAR FOREIGN BODY, MAGNETIC, IN OTHER OR MULTIPLE SITES |
| 360.60 | FOREIGN BODY, INTRAOCULAR, UNSPECIFIED                         |
| 360.60 | RETAINED (OLD) INTRAOCULAR FOREIGN BODY, NONMAGNETIC           |
| 360.61 | FOREIGN BODY IN ANTERIOR CHAMBER                               |
| 360.62 | FOREIGN BODY IN IRIS OR CILIARY BODY                           |
| 360.63 | FOREIGN BODY IN LENS                                           |
| 360.64 | FOREIGN BODY IN VITREOUS                                       |
| 360.65 | FOREIGN BODY IN POSTERIOR WALL OF EYE                          |
| 360.69 | INTRAOCULAR FOREIGN BODY IN OTHER OR MULTIPLE SITES            |
| 360.80 | OTHER DISORDERS OF GLOBE                                       |
| 360.81 | LUXATION OF GLOBE                                              |
| 360.89 | OTHER DISORDERS OF GLOBE                                       |
| 360.90 | UNSPECIFIED DISORDER OF GLOBE                                  |
| 362.81 | RETINAL HEMORRHAGE                                             |
| 363.30 | CHORIORETINAL SCARS                                            |
| 363.30 | CHORIORETINAL SCAR, UNSPECIFIED                                |
| 363.31 | SOLAR RETINOPATHY                                              |
| 363.32 | OTHER MACULAR SCARS OF RETINA                                  |
| 363.33 | OTHER SCARS OF POSTERIOR POLE OF RETINA                        |
| 363.34 | PERIPHERAL SCARS OF RETINA                                     |
| 363.35 | DISSEMINATED SCARS OF RETINA                                   |

| 363.60 | CHOROIDAL HEMORRHAGE AND RUPTURE          |
|--------|-------------------------------------------|
| Code   | Text                                      |
| 363.61 | CHOROIDAL HEMORRHAGE, UNSPECIFIED         |
| 363.62 | EXPULSIVE CHOROIDAL HEMORRHAGE            |
| 364.41 | HYPHEMA OF IRIS AND CILIARY BODY          |
| 365.65 | GLAUCOMA ASSOCIATED WITH OCULAR TRAUMA    |
| 366.20 | TRAUMATIC CATARACT, UNSPECIFIED           |
| 366.20 | TRAUMATIC CATARACT                        |
| 366.21 | LOCALIZED TRAUMATIC OPACITIES             |
| 366.22 | TOTAL TRAUMATIC CATARACT                  |
| 366.23 | PARTIALLY RESOLVED TRAUMATIC CATARACT     |
| 366.45 | TOXIC CATARACT                            |
| 370.24 | PHOTOKERATITIS                            |
| 371.00 | CORNEAL SCARS AND OPACITIES               |
| 371.00 | CORNEAL OPACITY, UNSPECIFIED              |
| 371.01 | MINOR OPACITY OF CORNEA                   |
| 371.02 | PERIPHERAL OPACITY OF CORNEA              |
| 371.03 | CENTRAL OPACITY OF CORNEA                 |
| 371.20 | CORNEAL EDEMA, UNSPECIFIED                |
| 371.20 | CORNEAL EDEMA                             |
| 372.06 | AC CHEM CONJUNCTIVITIS                    |
| 372.22 | CONTACT BLEPHAROCONJUNCTIVITIS            |
| 372.60 | CONJUNCTIVAL SCARS                        |
| 372.64 | SCARRING OF CONJUNCTIVA                   |
| 372.72 | CONJUNCTIVAL HEMORRHAGE                   |
| 372.73 | CONJUNCTIVAL EDEMA                        |
| 373.32 | CONTACT AND ALLERGIC DERMATITIS OF EYELID |
| 374.00 | OTHER DISORDERS OF EYELIDS                |
| 374.81 | HEMORRHAGE OF EYELID                      |
| 374.82 | EDEMA OF EYELID                           |
| 374.86 | RETAINED FOREIGN BODY OF EYELID           |
| 374.89 | OTHER DISORDERS OF EYELID                 |

|        |                                                                       |
|--------|-----------------------------------------------------------------------|
| 374.90 | UNSPECIFIED DISORDER OF EYELID                                        |
| 376.00 | ACUTE INFLAMMATION OF ORBIT, UNSPECIFIED                              |
| 376.00 | ACUTE INFLAMMATION OF ORBIT                                           |
| 376.32 | ORBITAL HEMORRHAGE                                                    |
| Code   | Text                                                                  |
| 376.33 | ORBITAL EDEMA OR CONGESTION                                           |
| 376.40 | DEFORMITY OF ORBIT                                                    |
| 376.40 | DEFORMITY OF ORBIT, UNSPECIFIED                                       |
| 376.47 | DEFORMITY OF ORBIT DUE TO TRAUMA OR SURGERY                           |
| 376.50 | ENOPHTHALMOS, UNSPECIFIED AS TO CAUSE                                 |
| 376.50 | ENOPHTHALMOS                                                          |
| 376.52 | ENOPHTHALMOS DUE TO TRAUMA OR SURGERY                                 |
| 376.60 | RETAINED (OLD) FOREIGN BODY FOLLOWING PENETRATING WOUND OF ORBIT      |
| 376.80 | OTHER ORBITAL DISORDERS                                               |
| 376.89 | OTHER ORBITAL DISORDERS                                               |
| 376.90 | UNSPECIFIED DISORDER OF ORBIT                                         |
| 379.23 | VITREOUS HEMORRHAGE                                                   |
| 379.80 | OTHER SPECIFIED DISORDERS OF EYE AND ADNEXA                           |
| 379.90 | UNSPECIFIED DISORDER OF EYE AND ADNEXA                                |
| 379.90 | DISORDER OF EYE, UNSPECIFIED                                          |
| 379.91 | PAIN IN OR AROUND EYE                                                 |
| 379.92 | SWELLING OR MASS OF EYE                                               |
| 379.99 | OTHER ILL-DEFINED DISORDERS OF EYE                                    |
| 802.60 | CLOSED FRACTURE OF ORBITAL FLOOR (BLOW-OUT)                           |
| 802.70 | OPEN FRACTURE OF ORBITAL FLOOR (BLOW-OUT)                             |
| 870.00 | OPEN WOUND OF OCULAR ADNEXA                                           |
| 870.00 | LACERATION OF SKIN OF EYELID AND PERIOCCULAR AREA                     |
| 870.10 | LACERATION OF EYELID, FULL-THICKNESS, NOT INVOLVING LACRIMAL PASSAGES |
| 870.20 | LACERATION OF EYELID INVOLVING LACRIMAL PASSAGES                      |

|        |                                                                   |
|--------|-------------------------------------------------------------------|
| 870.30 | PENETRATING WOUND OF ORBIT, WITHOUT MENTION OF FOREIGN BODY       |
| 870.40 | PENETRATING WOUND OF ORBIT WITH FOREIGN BODY                      |
| 870.80 | OTHER SPECIFIED OPEN WOUNDS OF OCULAR ADNEXA                      |
| Code   | Text                                                              |
| 870.90 | UNSPECIFIED OPEN WOUND OF OCULAR ADNEXA                           |
| 871.00 | OPEN WOUND OF EYEBALL                                             |
| 871.00 | OCULAR LACERATION WITHOUT PROLAPSE OF INTRAOCULAR TISSUE          |
| 871.10 | OCULAR LACERATION WITH PROLAPSE OR EXPOSURE OF INTRAOCULAR TISSUE |
| 871.20 | RUPTURE OF EYE WITH PARTIAL LOSS OF INTRAOCULAR TISSUE            |
| 871.30 | AVULSION OF EYE                                                   |
| 871.40 | UNSPECIFIED LACERATION OF EYE                                     |
| 871.50 | PENETRATION OF EYEBALL WITH MAGNETIC FOREIGN BODY                 |
| 871.60 | PENETRATION OF EYEBALL WITH NONMAGNETIC FOREIGN BODY              |
| 871.70 | UNSPECIFIED OCULAR PENETRATION                                    |
| 871.90 | UNSPECIFIED OPEN WOUND OF EYEBALL                                 |
| 918.00 | SUPERFICIAL INJURY OF EYELIDS AND PERIOCCULAR AREA                |
| 918.00 | SUPERFICIAL INJURY OF EYE AND ADNEXA                              |
| 918.10 | SUPERFICIAL INJURY OF CORNEA                                      |
| 918.20 | SUPERFICIAL INJURY OF CONJUNCTIVA                                 |
| 918.90 | OTHER AND UNSPECIFIED SUPERFICIAL INJURIES OF EYE                 |
| 921.00 | CONTUSION OF EYE AND ADNEXA                                       |
| 921.00 | BLACK EYE, NOT OTHERWISE SPECIFIED                                |
| 921.10 | CONTUSION OF EYELIDS AND PERIOCCULAR AREA                         |
| 921.20 | CONTUSION OF ORBITAL TISSUES                                      |
| 921.30 | CONTUSION OF EYEBALL                                              |

|        |                                                                                                                    |
|--------|--------------------------------------------------------------------------------------------------------------------|
| 921.90 | UNSPECIFIED CONTUSION OF EYE                                                                                       |
| 930.00 | FOREIGN BODY ON EXTERNAL EYE                                                                                       |
| 930.00 | CORNEAL FOREIGN BODY                                                                                               |
| 930.10 | FOREIGN BODY IN CONJUNCTIVAL SAC                                                                                   |
| 930.20 | FOREIGN BODY IN LACRIMAL PUNCTUM                                                                                   |
| 930.80 | FOREIGN BODY IN OTHER AND COMBINED SITES ON EXTERNAL EYE                                                           |
| Code   | Text                                                                                                               |
| 930.90 | FOREIGN BODY IN UNSPECIFIED SITE ON EXTERNAL EYE                                                                   |
| 940.00 | BURN CONFINED TO EYE AND ADNEXA                                                                                    |
| 940.00 | CHEMICAL BURN OF EYELIDS AND PERIOCLAR AREA                                                                        |
| 940.10 | OTHER BURNS OF EYELIDS AND PERIOCLAR AREA                                                                          |
| 940.20 | ALKALINE CHEMICAL BURN OF CORNEA AND CONJUNCTIVAL SAC                                                              |
| 940.30 | ACID CHEMICAL BURN OF CORNEA AND CONJUNCTIVAL SAC                                                                  |
| 940.40 | OTHER BURN OF CORNEA AND CONJUNCTIVAL SAC                                                                          |
| 940.50 | BURN WITH RESULTING RUPTURE AND DESTRUCTION OF EYEBALL                                                             |
| 940.90 | UNSPECIFIED BURN OF EYE AND ADNEXA                                                                                 |
| 941.02 | BURN OF UNSPECIFIED DEGREE OF EYE (WITH OTHER PARTS OF FACE, HEAD, AND NECK)                                       |
| 941.12 | ERYTHEMA (FIRST DEGREE) OF EYE (WITH OTHER PARTS OF FACE, HEAD, AND NECK)                                          |
| 941.22 | BLISTERS, EPIDERMAL LOSS (SECOND DEGREE) OF EYE (WITH OTHER PARTS OF FACE, HEAD, AND NECK)                         |
| 941.32 | FULL-THICKNESS SKIN LOSS (THIRD DEGREE, NOT OTHERWISE SPECIFIED) OF EYE (WITH OTHER PARTS OF FACE, HEAD, AND NECK) |
| 941.42 | DEEP NECROSIS OF UNDERLYING TISSUES (DEEP THIRD DEGREE) WITHOUT MENTION OF LOSS OF A BODY                          |

|        |                                                                                                                                     |
|--------|-------------------------------------------------------------------------------------------------------------------------------------|
|        | PART, OF EYE (WITH OTHER PARTS OF FACE, HEAD, AND NECK)                                                                             |
| 941.52 | DEEP NECROSIS OF UNDERLYING TISSUES (DEEP THIRD DEGREE) WITH LOSS OF A BODY PART, OF EYE (WITH OTHER PARTS OF FACE, HEAD, AND NECK) |
| 950.00 | OPTIC NERVE INJURY                                                                                                                  |
| 959.00 | OTHER AND UNSPECIFIED INJURY TO HEAD, FACE, AND NECK                                                                                |
| Code   | Text                                                                                                                                |
| 976.50 | POISONING BY EYE ANTI-INFECTIVES AND OTHER EYE DRUGS                                                                                |
| 995.55 | SHAKEN BABY SYNDROME                                                                                                                |
