# Supplementary material
Source: PubMed Central journal article supplement (PMC10153758)
Supplement: NIHMS1877881-supplement-2.pdf [file NIHMS1877881-supplement-2.pdf]

eSupplement 2. Prescriptions, imaging, and interventions in the evaluation and treatment of 740 ocular and adnexal injuries

| Intervention                       | No. (%)     |
|------------------------------------|-------------|
| <b>Medication</b>                  |             |
| Antibiotic (topical)               | 338 (45.7%) |
| Cycloplegic                        | 94 (12.7%)  |
| Steroid (topical)                  | 75 (10.1%)  |
| Antibiotic (oral)                  | 62 (8.4%)   |
| Anti-histamine (oral)              | 57 (7.7%)   |
| Opioid                             | 34 (4.6%)   |
| Ocular anti-hypertensive           | 11 (1.5%)   |
| Other <sup>a</sup>                 | 22 (2.9%)   |
| <b>Imaging studies</b>             |             |
| Head CT                            | 53 (7.2%)   |
| B-scan ultrasonography             | 14 (1.9%)   |
| X-ray                              | 11 (1.5%)   |
| Head MRI                           | 2 (0.3%)    |
| OCT                                | 1 (0.1%)    |
| <b>Procedure</b>                   |             |
| Eye irrigation                     | 43 (5.8%)   |
| Foreign body removal (superficial) | 16 (2.2%)   |
| Eyelid/Adnexal laceration repair   | 14 (1.9%)   |
| Foreign body removal (implanted)   | 5 (0.7%)    |
| Exam under anesthesia              | 3 (0.4%)    |
| Fracture repair                    | 2 (0.3%)    |
| Retina laser                       | 1 (0.1%)    |
| Corneal laceration repair          | 1 (0.1%)    |
| Open globe repair                  |             |

<sup>a</sup>Includes topical anesthetics, IV antibiotics, topical antihistamines, and oral steroids
